# Supplementary material
Source: Springer Nature journal article supplement (https://www.springermedizin.de/resource/supplementary/12936_2012_2126_MOESM5_ESM.pdf/9542656)
Supplement: MOESM5 [file 9542656]

| Input RNA (ng) | aminoallyl-cDNA (ng) | Dye-coupled cDNA (ng) | Dye Incorp. (fmol/ng) |
|----------------|----------------------|-----------------------|-----------------------|
| 500            | 463 +/- 13           | 241 +/- 4             | 17.2 +/- 0.4          |
| 2,000          | 630 +/- 26           | 393 +/- 3             | 14.9 +/- 0.5          |
| 5,000          | 928 +/- 12           | 655 +/- 4             | 30.1 +/- 0.4          |
| 10,000         | 1502 +/- 35          | 669 +/- 3             | 29.4 +/- 0.2          |

**Efficacy of cDNA generation & dye-coupling.** Table of titration series of total RNA starting amounts, resultant cDNA generation, dye-coupling, and array hybridization.
